# Supplementary material for: Endocrine Tumor Classification via Machine-Learning-Based Elastography: A Systematic Scoping Review
Source: MDPI journal article supplement (doi:10.3390/cancers15030837), 2023-01-29
Supplement: s1 [file s1]

**Table S1.** Search terms and operations.

| Database               | Search Field                                            | Search Terms                                                                                                                                                                                                                                                                                                                         |
|------------------------|---------------------------------------------------------|--------------------------------------------------------------------------------------------------------------------------------------------------------------------------------------------------------------------------------------------------------------------------------------------------------------------------------------|
| SCOPUS                 | Title/Abstract/Keywords                                 | (thyroid OR pancrea* OR adrenal OR endocrine) AND (elastograph* OR sonoelastograph*) AND (nodule* OR tumor OR tumour OR cancer OR carcinoma OR malignan* OR neoplas* OR mass*) AND ((machine learning) OR (deep learning) OR (neural network) OR CNN OR RNN OR ANN OR (cascaded networks) OR (deep cascade learning) OR GAN OR GANs) |
| Web of Science         | topic<br>(Title/Abstract/Author keywords/Keywords plus) | (thyroid OR pancrea* OR adrenal OR endocrine) AND (elastograph* OR sonoelastograph*) AND (nodule* OR tumor OR tumour OR cancer OR carcinoma OR malignan* OR neoplas* OR mass*) AND ((machine learning) OR (deep learning) OR (neural network) OR CNN OR RNN OR ANN OR (cascaded networks) OR (deep cascade learning) OR GAN OR GANs) |
| IEEEExpress            | Metadata<br>(Title/Abstract/Indexing terms)             | (thyroid OR pancrea* OR adrenal OR endocrine) AND (elastograph* OR sonoelastograph*) AND (nodule* OR tumor OR tumour OR cancer OR carcinoma OR malignan* OR neoplas* OR mass*) AND (machine learning OR deep learning OR neural network OR CNN OR RNN OR ANN OR cascaded networks OR deep cascade learning OR GAN OR GANs)           |
| PubMed                 | Title/Abstract                                          | (thyroid OR pancrea* OR adrenal OR endocrine) AND (elastograph* OR sonoelastograph*) AND (nodule* OR tumor OR tumour OR cancer OR carcinoma OR malignan* OR neoplas* OR mass*) AND ((machine learning) OR (deep learning) OR (neural network) OR CNN OR RNN OR ANN OR (cascaded networks) OR (deep cascade learning) OR GAN OR GANs) |
| EMBASE                 | Title/Abstract/Author keywords                          | (thyroid OR pancrea* OR adrenal OR endocrine) AND (elastograph* OR sonoelastograph*) AND (nodule* OR tumor OR tumour OR cancer OR carcinoma OR malignan* OR neoplas* OR mass*) AND ((machine learning) OR (deep learning) OR (neural network) OR CNN OR RNN OR ANN OR (cascaded networks) OR (deep cascade learning) OR GAN OR GANs) |
| CINAHL (via EbscoHost) | Default<br>(Title/Abstract/Keywords)                    | (thyroid OR pancrea* OR adrenal OR endocrine) AND (elastograph* OR sonoelastograph*) AND (nodule* OR tumor OR tumour OR cancer OR carcinoma OR malignan* OR neoplas* OR mass*) AND ((machine learning) OR (deep learning) OR (neural network) OR CNN OR RNN OR ANN OR (cascaded networks) OR (deep cascade learning) OR GAN OR GANs) |
